# Supplementary material for: Identification, Expression and Evolutional Analysis of Two cyp19-Like Genes in Amphioxus
Source: Preprints.org preprint supplement (doi:10.20944/preprints202403.0068.v1), 2024-03-01
Supplement: Supplementary file 1 [file supplementary]

**Table S1.** The GenBank accession numbers .

| **Title 1** |
| --- |
| NP_000094.2 aromatase [*Homo sapiens*]  NP_001335100.1 aromatase [*Mus musculus*]  XP_046780576.1 aromatase [*Gallus gallus*]  NP_001090630.1 CYP19A1 [*Xenopus tropicalis*]  XP_043533302.1 aromatase [*Chiloscyllium plagiosum*]  XP_048418626.1 aromatase [*Stegostoma fasciatum*]  XP_020386362.2 aromatase [*Rhincodon typus*]  XP_038669275.1 aromatase [*Scyliorhinus canicula*]  XP_041030878.1 aromatase [*Carcharodon carcharias*]  XP_032906075.1 aromatase [*Amblyraja radiata*]  XP_042199999.1 aromatase [*Callorhinchus milii*]  XP_038850963.1 aromatase-like [*Salvelinus namaycush*]  XP_014030724.1 aromatase [*Salmo salar*]  XP_026865672.2 aromatase [*Electrophorus electricus*]  XP_026877222.2 brain aromatase [*Electrophorus electricus*]  XP_042608630.1 brain aromatase [*Cyprinus carpio*]  XP_042599607.1 ovarian aromatase-like [*Cyprinus carpio*]  XP_026031446.1 brain aromatase-like [*Astatotilapia calliptera*]  XP_026019473.1 aromatase [*Astatotilapia calliptera*]  XP_005450866.1 brain aromatase [*Oreochromis niloticus*]  NP_571229.3 aromatase [*Danio rerio*]  XP_021326198.1 CYP19A1b [*Danio rerio*]  NP_001265808.1 aromatase [*Oryzias latipes*]  XP_011474159.1 CYP19A1b [*Oryzias latipes*]  XP_035672840.1 aromatase-like [*Branchiostoma floridae*]  XP_035669280.1 aromatase-like [*Branchiostoma floridae*]  XP_019626033.1 aromatase-like [*Branchiostoma belcheri*]  XP_019639573.1 aromatase-like [*Branchiostoma belcheri*]  XP_032801472.1 aromatase [*Petromyzon marinus*]  XP_033105836.1 aromatase-like [*Anneissia japonica*]  XP_057290659.1 aromatase-like [*Hydractinia symbiolongicarpus*]  NP_001189784.1 cytochrome P450 3A4 isoform 2 [*Homo sapiens*]  BAB20498.1 cytochrome P450, CYP3A [*Mus musculus*]  NP_001001751.2 cytochrome P450 family 3 subfamily A member 5 [*Gallus gallus*]  NP_997838.1 cytochrome P450, family 3, subfamily c, polypeptide 1 [*Danio rerio*]  NP_001292334.1 cytochrome P450, family 3, subfamily A [*Oryzias latipes*]  AGO32790.1 Cyp3A [*Azumapecten farreri*]  CAB4069313.1 CYP3A [*Lepeophtheirus salmonis*]  CAG2198897.1 CYP3A [*Mytilus edulis*]  CAE1256603.1 CYP3A [*Sepia pharaonis*]  AAA52140.1 CYP17A [*Homo sapiens*]  AAT01928.1 CYP17A [*Mus musculus*]  AUD11671.1 steroid 17-alpha-hydroxylase/17,20 lyase [*Anser cygnoides*]  AAT01120.1 cytochrome P450c17 [*Chelydra serpentina*]  NP_001090540.2 cytochrome P450 family 17 subfamily A member 1 [*Xenopus laevis*]  AAP41821.1 ovarian cytochrome P450c17 [*Danio rerio*]  AAR88432.1 P450c17 [*Anguilla japonica*]  NP_001118219.1 steroid 17-alpha-hydroxylase/17,20 lyase [*Oncorhynchus mykiss*]  WLF94733.1 steroid 17-alpha-hydroxylase/17,20 -like protein [*Apostichopus japonicus*]  NP_001187242.1 steroid 17-alpha-hydroxylase/17,20 *[Ictalurus punctatus*]  NP_001266694.1 steroid 17-alpha-hydroxylase/17,20 -like [*Oreochromis niloticus*]  XP_020555398.1 steroid 17-alpha-hydroxylase/17,20 isoform X1 [*Oryzias latipes*]  BAF61104.1 cytochrome P450 17alpha-hydroxylase/17, 20- [*Branchiostoma belcheri*]  AAA52140.1 CYP17A [*Homo sapiens*]  AAT01928.1 CYP17A [*Mus musculus*]  AUD11671.1 steroid 17-alpha-hydroxylase/17,20 lyase [*Anser cygnoides*]  AAT01120.1 cytochrome P450c17 [*Chelydra serpentina*]  NP_001090540.2 cytochrome P450 family 17 subfamily A member 1 L [*Xenopus laevis*]  AAP41821.1 ovarian cytochrome P450c17 [*Danio rerio*]  AAR88432.1 P450c17 [*Anguilla japonica*]  NP_001118219.1 steroid 17-alpha-hydroxylase/17,20 lyase [*Oncorhynchus mykiss*]  WLF94733.1 steroid 17-alpha-hydroxylase/17,20-like protein [*Apostichopus japonicus*]  NP_001187242.1 steroid 17-alpha-hydroxylase/17,20 lyase [*Ictalurus punctatus*]  NP_001266694.1 steroid 17-alpha-hydroxylase/17,20 lyase-like [*Oreochromis niloticus*]  XP_020555398.1 steroid 17-alpha-hydroxylase/17,20 lyase isoform X1 [*Oryzias latipes*]  AAB59440.1 steroid 21-hydroxylase [*Homo sapiens*]  BAA31153.1 steroid 21-hydroxylase [*Mus musculus*]  AFN53625.1 CYP21 [*Chrysolophus pictus*]  BAF63009.1 steroid 21-hydroxylase [*Gallus gallus*]  NP_001087443.1 cytochrome P450 family 21 subfamily A member 2, 1 L [*Xenopus laevis*]  BAC76051.1 cytochrome P450 21-hydroxylase [*Anguilla japonica*]  KAB7505058.1 Steroid 21-hydroxylase [*Armadillidium nasatum*] |
